# Supplementary material for: Functional analyses of ATM, ATR and Fanconi anemia proteins in lung carcinoma: ATM, ATR and FA in lung carcinoma
Source: PubMed Central journal article supplement (PMC4595318; doi:10.1186/s12885-015-1649-3), 2015-10-05
Supplement: 12885_2015_1649_MOESM3_ESM.pdf [file 12885_2015_1649_MOESM3_ESM.pdf]

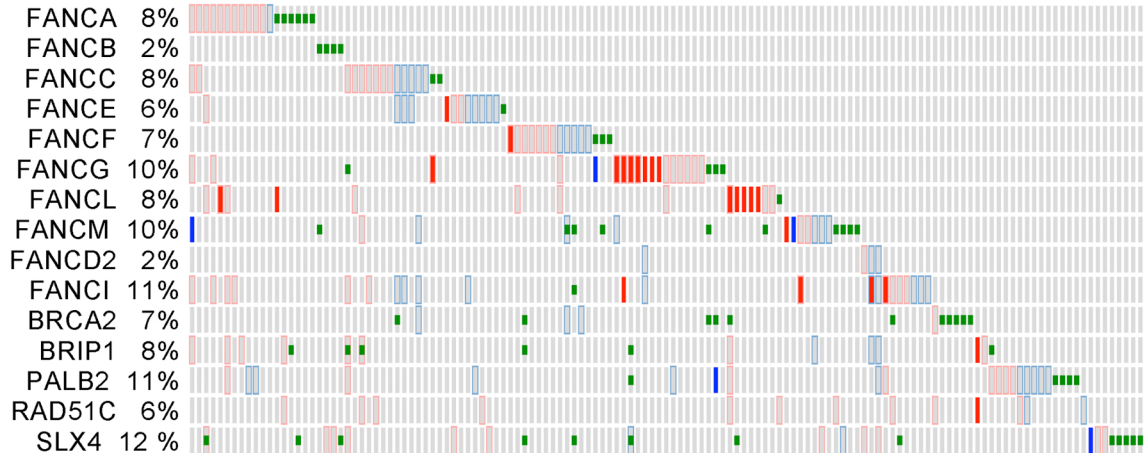

- Amplification
- Homozygous deletion
- Up-regulation (RNA)
- Down-regulation (RNA)
- Mutation
